# Supplementary material
Source: Royal Society of Chemistry journal article supplement (doi:10.1039/d6su00148c)
Supplement: d6su00148c1.pdf [file d6su00148c1.pdf]

## Supplementary Information

Low-pressure flow-through fractionation of *Quercus mongolica* for highly selective cellulose and reactive lignin recovery: a lignocellulosic biorefinery approach

### Table of contents

- Fig. S1      Reactor setup for low-pressure flow-through fractionation.
- Fig. S2      Particle size distribution of the cellulosic product from organosolv flow-through fractionation as a function of (a) pressure, (b) solvent concentration, (c) temperature, and (d) reaction time.
- Fig. S3      2D-HSQC NMR spectra of (a) MWL<sup>a</sup>, (b) KL<sup>b</sup>, and fractionated lignin with (c) water (2.3 MPa), (d) 50vol% EtOH (2.3 MPa), (e) 100vol% EtOH (2.3 MPa), and (f) 50vol% EtOH (3.4 MPa). <sup>a</sup>Milled wood lignin; <sup>b</sup>Kraft lignin
- Fig. S4      Enzymatic hydrolysis rate of hemicellulose in lignin-rich fraction.
- Table S1     Comparison of fractionation results from the existing literature.

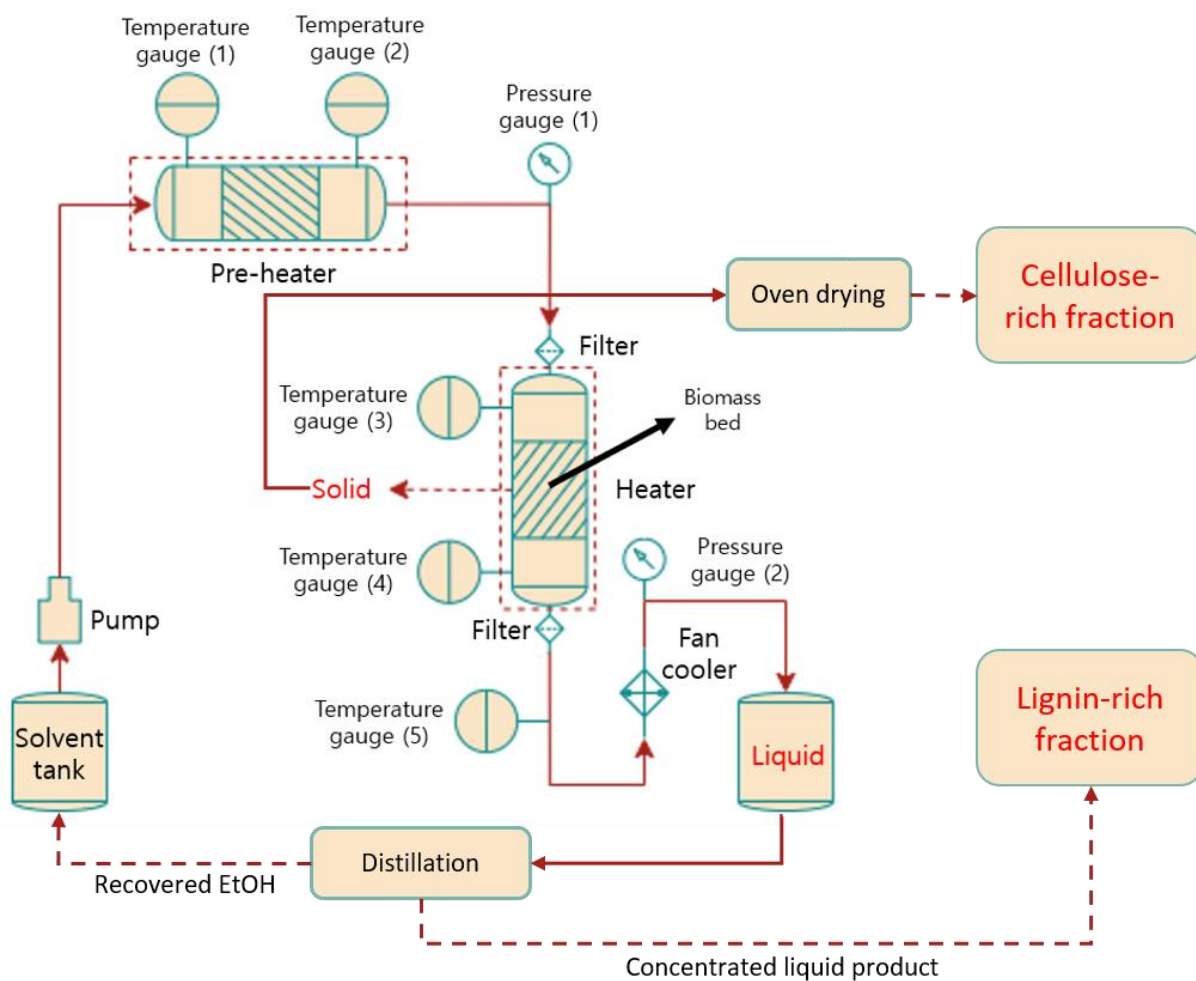

**Figure S1.** Reactor setup for low-pressure flow-through fractionation.

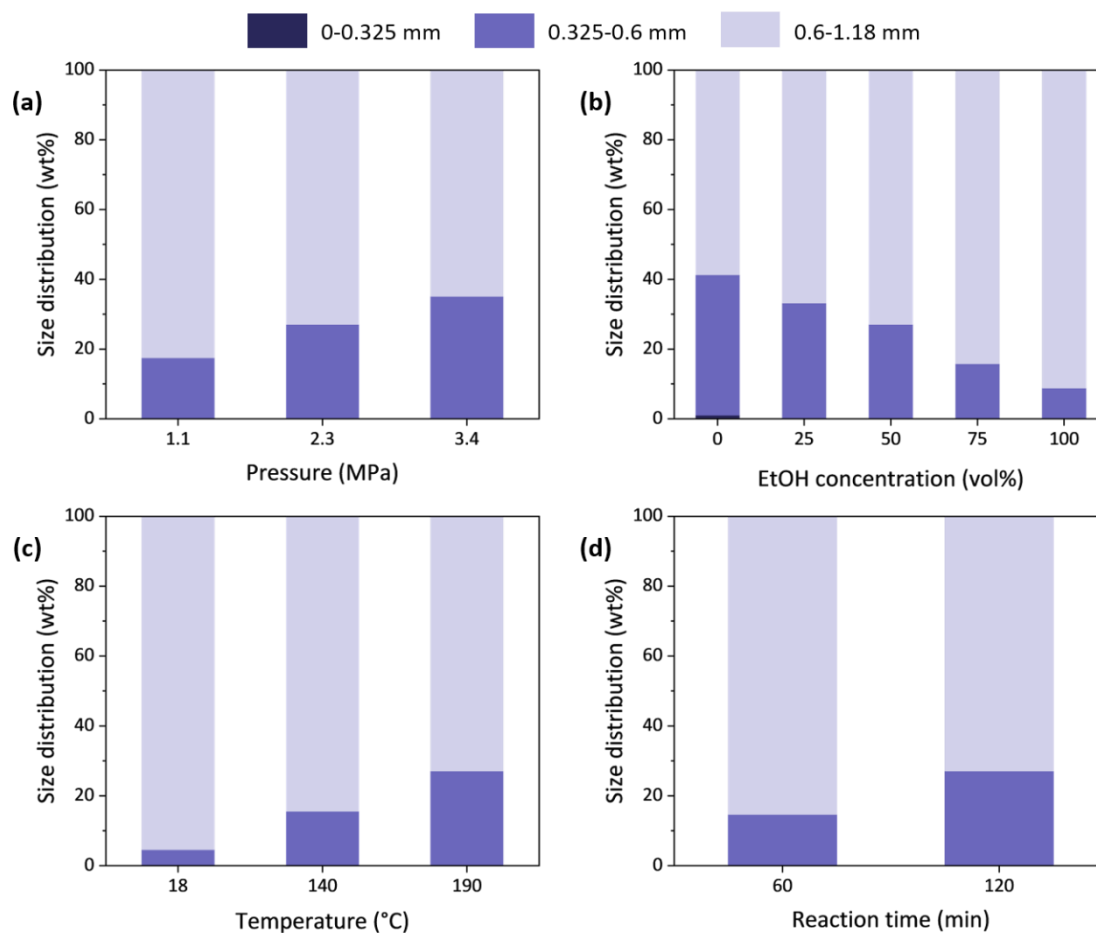

**Figure S2.** Particle size distribution of the cellulosic product from organosolv flow-through fractionation as a function of (a) pressure, (b) solvent concentration, (c) temperature, and (d) reaction time.

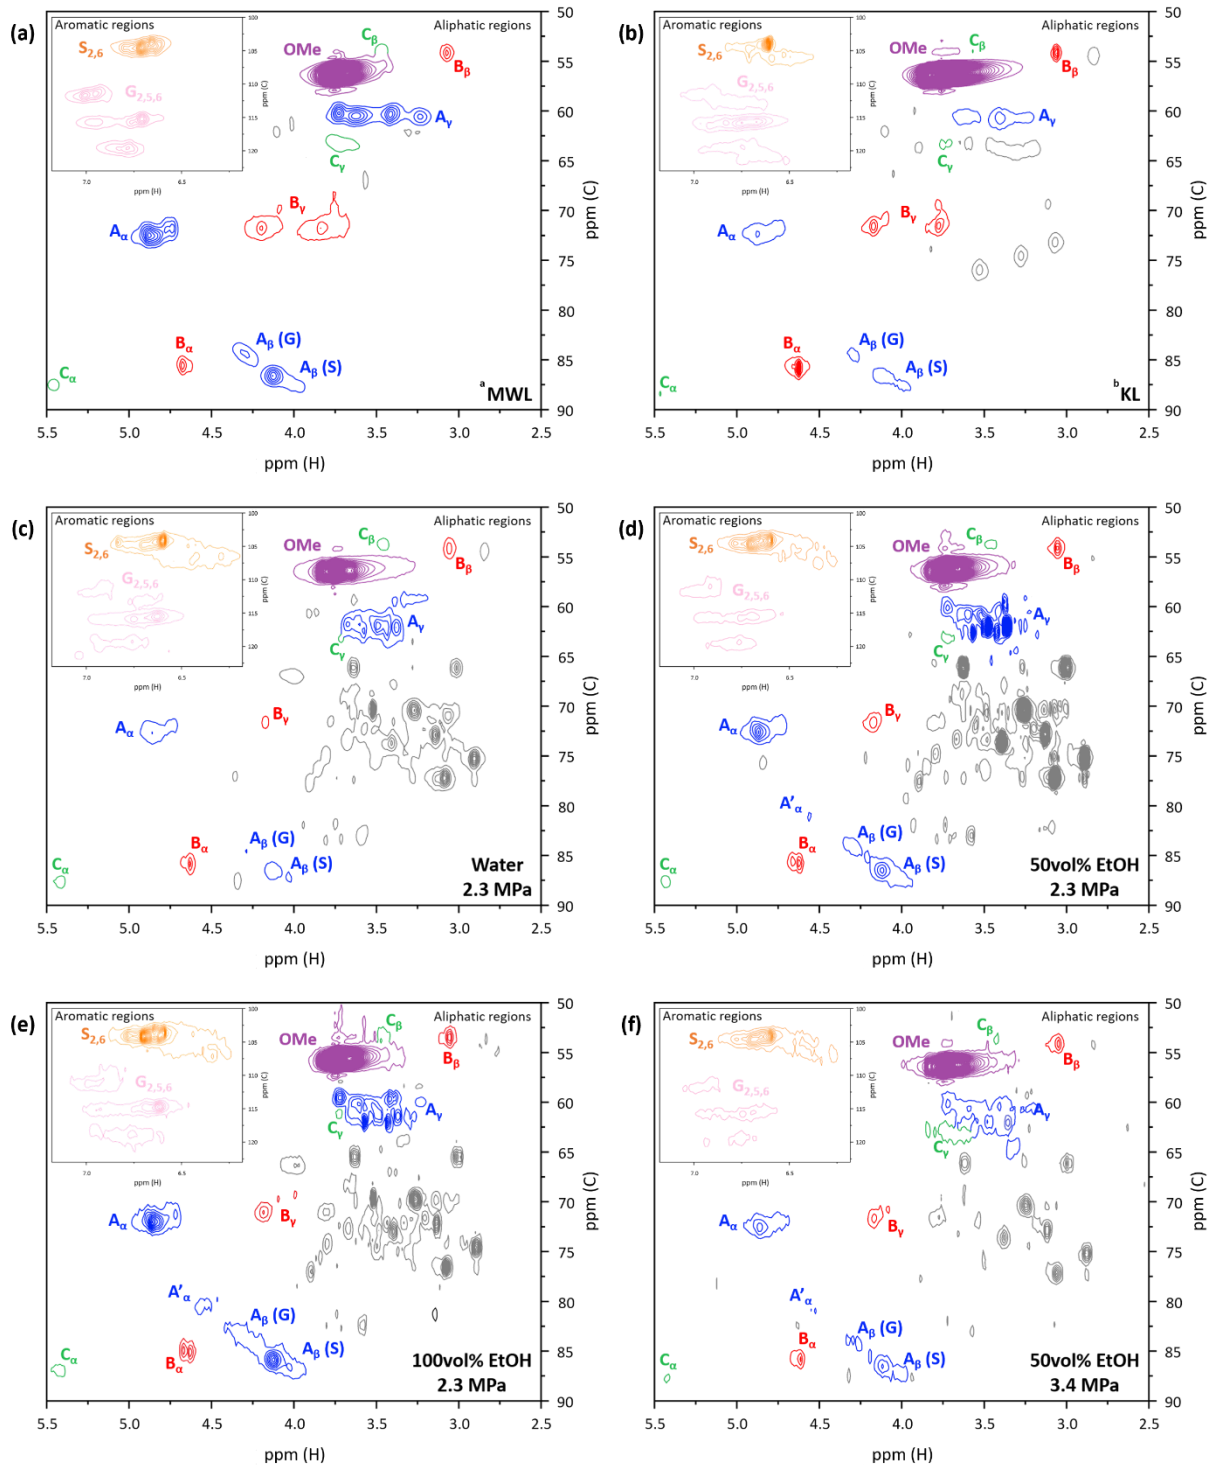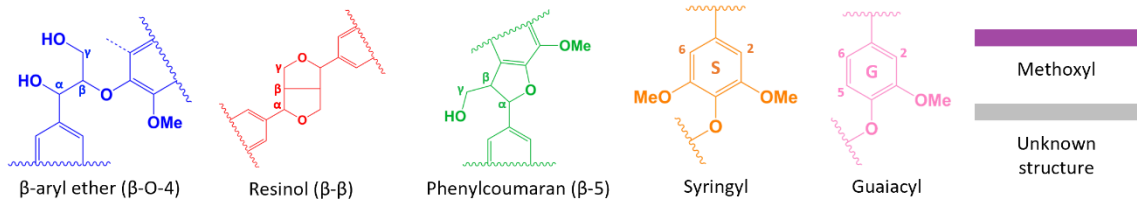

**Figure S3.** 2D-HSQC NMR spectra of (a) MWL<sup>a</sup>, (b) KL<sup>b</sup>, and fractionated lignin with (c) water (2.3 MPa), (d) 50vol% EtOH (2.3 MPa), (e) 100vol% EtOH (2.3 MPa), and (f) 50vol% EtOH (3.4 MPa). <sup>a</sup>Milled wood lignin; <sup>b</sup>Kraft lignin

The primary signals were assigned based on the literature,<sup>29,50</sup> and the detected linkages are depicted above (Fig. S3), including the inter-unit linkages  $\beta$ -O-4 aryl ether (A), resinol ( $\beta$ - $\beta$ , B), and phenylcoumaran ( $\beta$ -5, C). The cross-signals of  $C_{\alpha}$ - $H_{\alpha}$  in the  $\beta$ -O-4 substructure are explicitly located at  $\delta_C/\delta_H$  72.5/4.87. The cross-signals at  $\delta_C/\delta_H$  84.3/4.30 and 86.6/4.12 are attributed to  $C_{\beta}$ - $H_{\beta}$  correlations linked to G and S units in the  $\beta$ -O-4 substructure, respectively. Meanwhile, the resinol ( $\beta$ - $\beta$ , B) signals were also detected, and the  $C_{\alpha}$ - $H_{\alpha}$ ,  $C_{\beta}$ - $H_{\beta}$ , and  $C_{\gamma}$ - $H_{\gamma}$  correlations were observed at  $\delta_C/\delta_H$  85.6/4.67, 54.1/3.07, 71.7/4.19, and 3.83, respectively. Moreover, the phenylcoumaran ( $\beta$ -5, C) signals were found at  $C_{\alpha}$ - $H_{\alpha}$  ( $\delta_C/\delta_H$  87.5/5.45),  $C_{\beta}$ - $H_{\beta}$  ( $\delta_C/\delta_H$  53.7/3.46), and  $C_{\gamma}$ - $H_{\gamma}$  ( $\delta_C/\delta_H$  57.9/3.75).

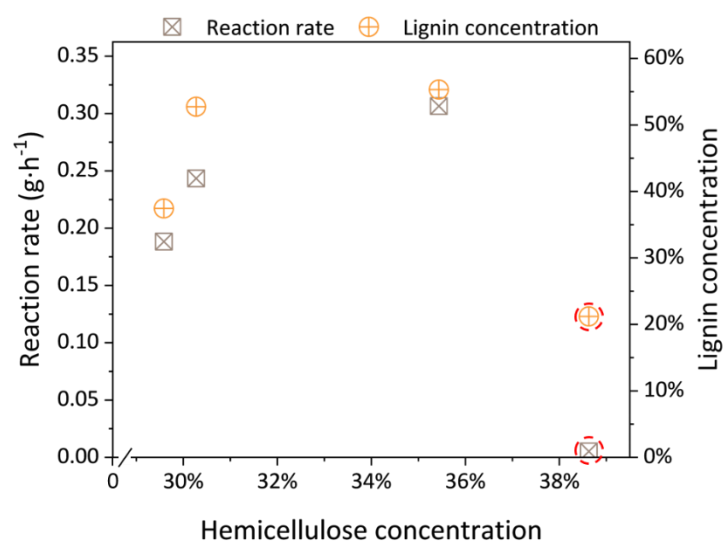

**Figure S4.** Enzymatic hydrolysis rate of hemicellulose in lignin-rich fraction.

**Table S1.** Comparison of fractionation results from the existing literature.

| <b>Biomass Sources</b>   | <b>System</b> | <b>Solvent</b>   | <b>Catalyst</b>                            | <b>Pressure</b> | <b>Temperature</b> | <b>Duration</b> | <b>Delignification (%)</b> | <b>Total <math>\beta</math>-O-4</b> | <b>References</b> |
|--------------------------|---------------|------------------|--------------------------------------------|-----------------|--------------------|-----------------|----------------------------|-------------------------------------|-------------------|
| Willow wood              | Batch         | 94 wt% EtOH      | -                                          | -               | 190 °C             | 180 mins        | 39.6                       | -                                   | [14]              |
| Wheat straw              | Batch         | 60 vol% EtOH     | 30 mM H <sub>2</sub> SO <sub>4</sub>       | -               | 190 °C             | 60 mins         | 75.8                       | -                                   | [10]              |
| Poplar                   | Batch         | 60 vol% EtOH     | 1.25 wt%<br>H <sub>2</sub> SO <sub>4</sub> | -               | 180 °C             | 60 mins         | 84.0                       | 2.0                                 | [28]              |
| Eucalyptus residues      | Batch         | 50 vol% EtOH     | 1,000 mM<br>H <sub>2</sub> SO <sub>4</sub> | -               | 190 °C             | 120 mins        | 79.0                       | -                                   | [11]              |
| <i>Pinus radiata</i>     | Batch         | 50 vol% EtOH     | -                                          | -               | 210 °C             | 75 mins         | 81.8                       | -                                   | [15]              |
| <i>Pinus taeda</i>       | Flow-through  | 50 vol% EtOH     | -                                          | 19.0 MPa        | 170 °C             | 120 mins        | 84.9                       | -                                   | [35]              |
| Corn stover              | Flow-through  | H <sub>2</sub> O | -                                          | 2.5 MPa         | 190 °C             | 30 mins         | 75.0                       | -                                   | [31]              |
| Beech wood               | Flow-through  | 95 vol% EtOH     | 180 mM H <sub>2</sub> SO <sub>4</sub>      | 0.6 MPa         | 120 °C             | 120 mins        | 73.0                       | 43.0                                | [6]               |
| <i>Quercus mongolica</i> | Flow-through  | 50 vol% EtOH     | -                                          | 2.3 MPa         | 190 °C             | 120 mins        | 87.9                       | 20.8                                | <b>This study</b> |
